# Supplementary material for: Differential Response of Müller Cells and Microglia in a Mouse Retinal Detachment Model and Its Implications in Detached and Non-Detached Regions
Source: MDPI journal article supplement (doi:10.3390/cells10081972), 2021-08-03
Supplement: s1 [file s1]

Supplementary Figure

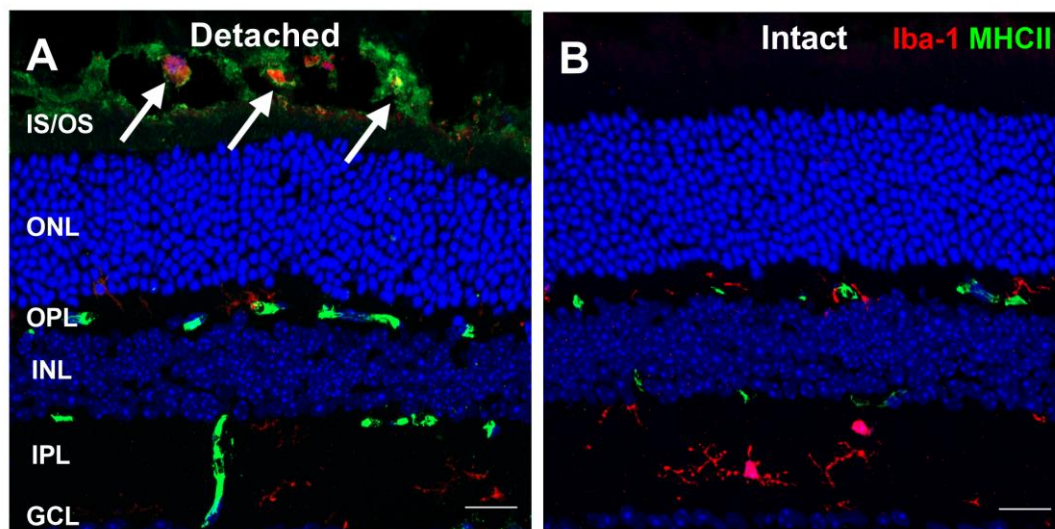

**Supplementary Figure S1.** MHC-II expression in a mouse RD model. (A,B) Confocal micrographs of a vertical cryosection of the retina at 5 days after RD in detached (A) and intact (B) regions. Subretinal microglial cells (arrows) in detached retina expressed MHC-II in the detached region (A), but not in the intact region (B). Scale bars, 20  $\mu$ m.
